# Supplementary material for: Daily Exposure to a Cranberry Polyphenol Oral Rinse Alters the Oral Microbiome but Not Taste Perception in PROP Taster Status Classified Individuals
Source: MDPI journal article supplement (doi:10.3390/nu14071492), 2022-04-02
Supplement: s1 [file s1]

**Table S1.** List of salivary proteins and peptides quantified by HPLC-low resolution-ESI-MS. Swiss-Prot Code, experimental and theoretical average mass values  $\pm$  standard deviations (SD) and elution times of the proteins and peptides analyzed.

| Protein (Swiss-Prot Code)*                                 | Experimental Average Mass (Da) $\pm$ SD (Theoretical) | Elution Time (min $\pm$ 0.5) | Abbreviated as: |
|------------------------------------------------------------|-------------------------------------------------------|------------------------------|-----------------|
| <i>Acidic proline-rich phosphoproteins family (aPRPs):</i> |                                                       |                              | TOT aPRP        |
| P-C peptide (P02810)                                       | 4370.9 $\pm$ 0.4 (4370.8)                             | 13.6-14.5                    | PC              |
| PRP-1 type di-phosphorylated (P02810)                      | 15515 $\pm$ 2 (15514-15515)                           | 22.9-23.3                    | PRP-1 TOT       |
| PRP-1 type mono-phosphorylated                             | 15435 $\pm$ 2 (15434-15435)                           | 23.9-24.3                    |                 |
| PRP-1 type non-phosphorylated                              | 15355 $\pm$ 2 (15354-15355)                           | 24.2-24.7                    |                 |
| PRP-1 type tri-phosphorylated                              | 15595 $\pm$ 2 (15594-15595)                           | 22.6-22.9                    |                 |
| PRP-3 type di-phosphorylated (P02810)                      | 11161 $\pm$ 1 (11161-11162)                           | 23.3-23.8                    | PRP-3 TOT       |
| PRP-3 type mono-phosphorylated                             | 11081 $\pm$ 1 (11081-11082)                           | 23.8-24.2                    |                 |
| PRP-3 type non-phosphorylated                              | 11001 $\pm$ 1 (11001-11002)                           | 24.8-25.1                    |                 |
| PRP-3 type di-phosphorylated Des-Arg <sup>106</sup>        | 11004 $\pm$ 1 (11005-11006)                           | 23.5-23.8                    |                 |
| <i>Histatin family (Hists):</i>                            |                                                       |                              | TOT HIS         |
| Histatin-1(P015515)                                        | 4928.2 $\pm$ 0.5 (4928.2)                             | 23.3-23.8                    | HIS-1           |
| Histatin-1 non-phosphorylated                              | 4848.2 $\pm$ 0.5 (4848.2)                             | 23.4-23.8                    | HIS-1-0P        |
| Histatin-6 (P15516)                                        | 3192.4 $\pm$ 0.3 (3192.5)                             | 14.0-14.4                    | HIS-5+HIS-6     |
| Histatin-5 (P15516)                                        | 3036.5 $\pm$ 0.3 (3036.3)                             | 14.2-14.7                    |                 |
| <i>Basic proline-rich protein family (bPRPs):</i>          |                                                       |                              | TOT bPRP        |
| Ps-1                                                       | 23460 $\pm$ 3 (23459.0)                               | 17.0-18.0                    | Ps1             |
| P-J                                                        | 5943.9 $\pm$ 0.5 (5943.6)                             | 14.1-14.7                    | PJ              |
| P-H (P02812/P04280)                                        | 5590.2 $\pm$ 0.5 (5590.1)                             | 15.0-15.5                    | PH              |
| P-F (P02812)                                               | 5843.0 $\pm$ 0.5 (5842.5)                             | 14.3-14.8                    | PF              |
| P-D (P010163)                                              | 6949.5 $\pm$ 0.7 (6949.7)                             | 15.2-15.8                    | PD              |
| II-2 (Tot):                                                |                                                       |                              | II-2 TOT        |
| - II-2 (P04280)                                            | 7609 $\pm$ 1 (7609.2)                                 | 18.7-19.1                    |                 |
| - II-2 non-phosphorylated                                  | 7529 $\pm$ 1 (7529.2)                                 | 19.5-19.8                    |                 |
| - II-2 Des-Arg <sup>75</sup>                               | 7453 $\pm$ 1 (7453.0)                                 | 18.8-19.2                    |                 |
| IB-8a (Tot):                                               |                                                       |                              | IB-8a TOT       |
| - IB-8a (Con1+)                                            | 11888 $\pm$ 2 (11887.8)                               | 17.1-17.8                    |                 |
| - IB-8a (Con1-)                                            | 11898 $\pm$ 2 (11896.2)                               | 17.1-17.8                    |                 |
| IB-1 (Tot):                                                |                                                       |                              | IB-1 TOT        |
| - IB-1 (P04281)                                            | 9593 $\pm$ 1 (9593.4)                                 | 18.8-19.3                    |                 |
| - IB-1 non-phosphorylated                                  | 9513 $\pm$ 1 (9513.4)                                 | 19.4-19.7                    |                 |
| - IB-1 Des-Arg <sup>96</sup>                               | 9437 $\pm$ 1 (9437.2)                                 | 19.0-19.4                    |                 |
| IB-7 (P02812)                                              | 5769.0 $\pm$ 0.5 (5769.4)                             | 14.2-14.6                    | IB-7            |
| <i>Statherin family (Staths)</i>                           |                                                       |                              | Stath-TOT       |
| Statherin di-phosphorylated (P02808)                       | 5380.0 $\pm$ 0.5 (5379.7)                             | 28.9-29.5                    | Stath-2P        |
| Statherin mono-phosphorylated                              | 5299.9 $\pm$ 0.5 (5299.7)                             | 28.7-29.1                    | Stath-1P        |
| Statherin non-phosphorylated (P02808)                      | 5220.5 $\pm$ 0.5 (5219.7)                             | 28.4-28.8                    | Stath-0P        |
| <i>Cystatin family (S-type Cysts)</i>                      |                                                       |                              | CYST TOT        |

|                                    |                       |           |         |
|------------------------------------|-----------------------|-----------|---------|
| Cyst S non-phosphorylated (P01036) | 14,186 ± 2 (14185)    | 36.5-37.1 | CYST S  |
| Cyst S mono-phosphorylated (S1)    | 14,266 ± 2 (14265)    | 36.6-37.1 | CYST S1 |
| Cyst S di-phosphorylated (S2)      | 14,346 ± 2 (14345)    | 36.8-37.2 | CYST S2 |
| Cyst SN (P01037)                   | 14,312 ± 2 (14313)    | 34.8-35.2 | CYST SN |
| Cyst SA (P09228)                   | 14,347 ± 2 (14346)    | 38.4-38.9 | CYST SA |
| <b>PB</b>                          | 5972.9 ± 0.5 (5792.7) | 29.4-30.5 | PB      |

\*Identification was based on the chromatographic behavior and comparison of the experimental mass values with the theoretical ones reported in the Swiss-Prot Data Bank (<http://us.expasy.org/tools>, accessed on 14 October 2021).

**Table S2.** Specific ASVIDs in coabundant guilds.

| Coabundant Guild (CAG) | ASVID                                            |
|------------------------|--------------------------------------------------|
| CAG1                   | Neisseria ASV032P                                |
| CAG1                   | Prevotella sp. oral taxon 299 str. F0039 ASV0658 |
| CAG1                   | Prevotella sp. oral taxon 299 str. F0039 ASV065A |
| CAG1                   | Rothia ASV00H9                                   |
| CAG1                   | Streptococcus ASV004F                            |
| CAG1                   | Actinomyces ASV00CP                              |
| CAG1                   | Lachnoanaerobaculum ASV065V                      |
| CAG2                   | Prevotella melaninogenica ASV0657                |
| CAG2                   | Prevotella 7 ASV065E                             |
| CAG2                   | Alloprevotella ASV065F                           |
| CAG2                   | Prevotella pallens ASV065I                       |
| CAG2                   | Prevotella pallens ASV065J                       |
| CAG2                   | Prevotella 7 ASV065L                             |
| CAG2                   | Prevotella 6 ASV065M                             |
| CAG2                   | Actinomyces ASV0071                              |
| CAG2                   | Prevotella sp. oral clone P4PB_83 P2 ASV065Y     |
| CAG2                   | Veillonella ASV066R                              |
| CAG2                   | Veillonella ASV067C                              |
| CAG3                   | Veillonella ASV0065                              |
| CAG3                   | Prevotella 7 ASV065B                             |
| CAG3                   | Veillonella ASV05U4                              |
| CAG3                   | Prevotella 7 ASV065H                             |
| CAG3                   | Prevotella melaninogenica ASV065R                |
| CAG3                   | Streptococcus ASV007C                            |
| CAG3                   | Atopobium ASV051F                                |
| CAG4                   | [Eubacterium] infirmum ASV065P                   |
| CAG4                   | Ruminococcaceae UCG-014 ASV065W                  |
| CAG4                   | Leptotrichia ASV065X                             |
| CAG4                   | Lachnoanaerobaculum ASV0661                      |
| CAG5                   | Veillonella ASV00BD                              |
| CAG5                   | Selenomonas 3 ASV065G                            |
| CAG5                   | Granulicatella ASV008P                           |
| CAG5                   | Saccharimonadaceae ASV00AI                       |
| CAG5                   | Porphyromonas ASV065Q                            |
| CAG5                   | Aggregatibacter ASV0665                          |
| CAG5                   | Oribacterium sinus ASV066M                       |
| CAG5                   | TM7 phylum sp. oral clone FR058 ASV03VD          |

|       |                                            |
|-------|--------------------------------------------|
| CAG5  | Selenomonas ASV066U                        |
| CAG5  | Granulicatella ASV066V                     |
| CAG5  | Solobacterium ASV066Y                      |
| CAG5  | Oribacterium ASV0684                       |
| CAG6  | Rothia ASV02Z9                             |
| CAG6  | Megasphaera micronuciformis ASV034R        |
| CAG6  | Corynebacterium ASV066Q                    |
| CAG6  | Corynebacterium ASV00AG                    |
| CAG6  | Selenomonas 3 ASV0680                      |
| CAG6  | Kingella ASV0682                           |
| CAG6  | Tannerella ASV068E                         |
| CAG6  | Prevotella denticola ASV069N               |
| CAG6  | Saccharimonadaceae ASV062M                 |
| CAG7  | Streptococcus ASV0663                      |
| CAG7  | Fusobacterium ASV066G                      |
| CAG7  | Mogibacterium ASV067F                      |
| CAG7  | Fusobacterium ASV068D                      |
| CAG7  | Selenomonas 3 ASV068Y                      |
| CAG7  | Paludibacteraceae F0058 ASV06AM            |
| CAG8  | Actinomyces ASV006E                        |
| CAG8  | Campylobacter concisus ASV030Q             |
| CAG8  | Alloprevotella ASV065D                     |
| CAG8  | Actinomyces ASV009P                        |
| CAG8  | Selenomonas ASV066N                        |
| CAG8  | Rothia ASV0670                             |
| CAG8  | Fusobacterium ASV0672                      |
| CAG8  | Prevotella oris ASV067B                    |
| CAG8  | Prevotella nigrescens ASV067H              |
| CAG8  | Streptococcus ASV068B                      |
| CAG8  | Prevotella oris ASV068T                    |
| CAG8  | Streptococcus mutans ASV00DH               |
| CAG8  | Scardovia ASV069V                          |
| CAG9  | Porphyromonas ASV0659                      |
| CAG9  | Alloprevotella ASV065C                     |
| CAG9  | Actinomyces graevenitzii F0530 ASV0646     |
| CAG9  | Mannheimia ASV05TC                         |
| CAG9  | Capnocytophaga ASV0677                     |
| CAG9  | Actinomycetaceae F0332 ASV0687             |
| CAG9  | Porphyromonas ASV068V                      |
| CAG10 | Gemella ASV01LV                            |
| CAG10 | Actinobacillus porcinus ASV066I            |
| CAG10 | Haemophilus ASV066P                        |
| CAG10 | Prevotella 2 ASV066S                       |
| CAG10 | Eikenella ASV0671                          |
| CAG10 | Porphyromonas sp. oral clone HF001 ASV068X |
| CAG10 | (Eubacterium) brachy group ASV06AC         |
| CAG11 | Streptococcus ASV00T3                      |
| CAG11 | Haemophilus ASV00MT                        |
| CAG11 | Veillonella ASV00QW                        |
| CAG11 | Rothia ASV0519                             |
| CAG11 | Actinomyces ASV065U                        |
| CAG11 | Rothia ASV0337                             |
| CAG12 | Fusobacterium ASV05VS                      |

|       |                                                |
|-------|------------------------------------------------|
| CAG12 | Bergeyella ASV0668                             |
| CAG12 | Peptostreptococcus ASV00JI                     |
| CAG12 | Capnocytophaga ASV066T                         |
| CAG12 | Clostridiales bacterium oral taxon 075 ASV067D |
| CAG12 | Candidatus Saccharimonas ASV067I               |
| CAG12 | Dialister ASV02ZY                              |
| CAG12 | Peptococcus ASV06AQ                            |
| <hr/> |                                                |
| CAG13 | Neisseria ASV065K                              |
| CAG13 | Prevotella 2 ASV065N                           |
| CAG13 | Lautropia ASV0660                              |
| CAG13 | Stomatobaculum ASV0666                         |
| CAG13 | Oribacterium ASV066E                           |
| CAG13 | Fusobacterium ASV066K                          |
| CAG13 | Butyrivibrio 2 ASV066W                         |
| CAG13 | Campylobacter ASV067T                          |
| CAG13 | Catonella ASV068G                              |
| CAG13 | Cardiobacterium ASV068S                        |
| CAG13 | Capnocytophaga gingivalis ASV0692              |
| <hr/> |                                                |
